# Supplementary material for: A real-world longitudinal study of anemia management in non-dialysis-dependent chronic kidney disease patients: a multinational analysis of CKDopps
Source: PubMed Central journal article supplement (PMC7815803; doi:10.1038/s41598-020-79254-6), 2021-01-19
Supplement: 41598_2020_79254_MOESM1_ESM.pdf [file 41598_2020_79254_MOESM1_ESM.pdf]

**A Real-World Longitudinal Study of Anemia Management in Non-Dialysis-Dependent Chronic Kidney Disease Patients: a Multinational Analysis of CKDopps**

Marcelo Barreto Lopes, Charlotte Tu, Jarcy Zee, Murilo Guedes, Ronald L. Pisoni, Bruce M. Robinson, Bryce Foote, Katarina Hedman, Glen James, Antonio Alberto Lopes, Ziad Massy, Helmut Reichel, James Sloand, Sandra Waechter, Michelle M.Y. Wong, Roberto Pecoits-Filho

**Supplemental Table 1.** Laboratory values and treatment data at treatment initiation among new users, by type of treatment started

|                                 | Overall    |           |           |
|---------------------------------|------------|-----------|-----------|
|                                 | Oral Iron  | IV Iron   | ESA       |
| Patients, N                     | 370        | 138       | 258       |
| % on monotherapy                | 94%        | 71%       | 80%       |
| <b>Laboratory values*</b>       |            |           |           |
| CKD stage                       |            |           |           |
| Stage 3                         | 25%        | 13%       | 9%        |
| Stage 4                         | 59%        | 59%       | 50%       |
| Stage 5                         | 16%        | 29%       | 41%       |
| eGFR, ml/min/1.73m <sup>2</sup> | 24.7(10.6) | 20.6(9.4) | 18.5(8.2) |
| Hemoglobin, g/dL                | 11.2(1.5)  | 10.9(1.5) | 10.2(1.4) |
| Ferritin, ng/mL                 | 90         | 101       | 180       |

|                                |           |            |           |
|--------------------------------|-----------|------------|-----------|
|                                | [47,194]  | [51,191]   | [95,362]  |
| Ferritin <100 ng/mL            | 57%       | 49%        | 26%       |
| TSAT, %                        | 19.1(9.9) | 19.3(10.5) | 23.2(9.4) |
| TSAT <20 %                     | 62%       | 64%        | 37%       |
| <b>ESA type</b>                |           |            |           |
| Patients with ESA type data, N | 17        | 34         | 247       |
| Darbepoetin alfa               | 29%       | 38%        | 50%       |
| Epoetin alfa                   | 65%       | 50%        | 34%       |
| Epoetin beta – pegylated       | 6%        | 15%        | 16%       |
